# Supplementary material for: Distinct glutamatergic projections of the posteroventral medial amygdala play different roles in arousal and anxiety
Source: JCI journal article supplement (doi:10.1172/jci.insight.176329), 2024-06-06
Supplement: sd1 [file 1]

You are being redirected.
